# Supplementary material for: Multi-national survey on the methods, efficacy, and safety on the post-approval clinical use of pulsed field ablation (MANIFEST-PF)
Source: PubMed Central journal article supplement — Europace. 2022 Jun 1;24(8):1256–66. doi: 10.1093/europace/euac050 (PMC9435639; doi:10.1093/europace/euac050), 2022-06-01
Supplement: euac050_supplementary_data.pdf [file euac050_supplementary_data.pdf]

## ONLINE SUPPLEMENT

# Multi-national Survey on the Methods, Efficacy and Safety on the Post-approval Clinical use of Pulsed Field Ablation (*MANIFEST-PF*)

Emmanuel Ekanem MD, Vivek Y. Reddy MD, Boris Schmidt MD, Tobias Reichlin MD, Kars Neven MD, Andreas Metzner MD, Jim Hansen MD, Yuri Blaauw MD, Philippe Maury MD, Thomas Arentz MD, Philipp Sommer MD, Ante Anic MD, Frederic Anselme MD, Serge Boveda MD, Tom Deneke MD, Stephan Willems MD, Pepijn van der Voort MD, Roland Tilz MD, Moritoshi Funasako MD, Daniel Scherr MD, Reza Wakili MD, Daniel Steven MD, Josef Kautzner MD, Johan Vijgen MD, Pierre Jais MD, Jan Petru MD, Julian Chun MD, Lauren Roten MD, Anna Fütting MD, Andreas Rillig MD, Bart A Mulder MD PhD, Arne Johannessen MD, Anne Rollin MD, Heiko Lehmann MD, Christian Sohns MD, Zrinka Jurisic MD PhD, Arnaud Savoure MD, Stephanes Combes MD, Karin Nentwich MD, Melanie Gunawande MD, Alexandre Ouss MD, Bettina Kirstein MD, Martin Manninger MD PhD, Jan-Eric Bohnen MD, Arian Sultan MD, Petr Peichl MD, Pieter Koopman MD, Nicolas Derval MD, Mohit K. Turagam MD and Petr Neuzil MD PhD (for the *MANIFEST-PF* Cooperative)

### **Table of Contents**

|                   |                                 |
|-------------------|---------------------------------|
| <b>Page 2:</b>    | Additional Disclosures          |
| <b>Pages 3-7:</b> | <i>MANIFEST-PF</i> Survey Forms |
| <b>Page 8:</b>    | Routine Post-PFA Brain MRI      |

## **Additional Disclosures**

Vivek Reddy's disclosures with medical companies unrelated to this manuscript include: Abbott (Consultant), Ablacon (Consultant, Equity), Acutus Medical (Consultant, Equity), Affera (Consultant, Equity), Apama Medical (Consultant, Equity), APN Health (Consultant, Equity), Aquaheart (Consultant, Equity), Atacor (Consultant, Equity), AtiAN (Consultant), Autonomix (Consultant, Equity), Axon Therapies (Consultant, Equity), Backbeat (Consultant, Equity), BioSig (Consultant, Equity), Biosense-Webster (Consultant), BioTel Heart (Consultant), Biotronik (Consultant), Boston Scientific (Consultant), Cardiac Implants (Consultant, Equity), CardiaCare (Consultant, Equity), Cardiofocus (Consultant), Cardionomic (Consultant), CardioNXT / AFTx (Consultant, Equity), Circa Scientific (Consultant, Equity), CoreMap (Consultant), CoRISMA (Consultant, Equity), Corvia Medical (Consultant, Equity), Dinova-Hangzhou DiNovA EP Technology (Consultant, Equity), East End Medical (Consultant, Equity), EBR (Consultant), EPD-Philips (Consultant, Equity), EP Frontiers (Consultant, Equity), Epix Therapeutics (Consultant, Equity), EpiEP (Consultant, Equity), Eximo (Consultant, Equity), Fire1 (Consultant), Gore & Associates (Consultant), HRT (Consultant, Equity), Impulse Dynamics (Consultant), Intershunt (Consultant, Equity), Javelin (Consultant, Equity), Kardia (Consultant, Equity), Keystone Heart (Consultant, Equity), LuxMed (Consultant, Equity), Manual Surgical Sciences (Equity), Medlumics (Consultant, Equity), Medtronic (Consultant), Middlepeak (Consultant, Equity), Neutrace (Consultant, Equity), Newpace (Equity), Nuvera-Biosense Webster (Consultant, Equity), Philips (Consultant), Pulse Biosciences (Consultant), Restore Medical (Consultant, Equity), Sirona Medical (Consultant, Equity), Surecor (Equity), Valcare (Consultant, Equity) and Vizamed (Equity).

## MANIFEST-PF Survey Forms

**MANIFEST-PF: Multi-national Survey on Methods, Efficacy and Safety on the Post-approval  
Clinical use of Pulsed Field Ablation**  
**[ Case Report Form ]**

1. Region: Which country is your center from? \_\_\_\_\_
  
2. Demographics/Practice:
  - a. How many different operators at your center perform pulsed field ablation?  
\_\_\_\_\_
  - b. Years in practice of the electrophysiologist(s)  
\_\_\_\_\_
  - c. Approximate annual number of AF ablations performed at your center  
\_\_\_\_\_
  - d. Practice location: Academic, Semi-academic, Private  
\_\_\_\_\_
  
3. When was commercial pulsed field ablation introduced at your center (month/year)?  
\_\_\_\_\_
  
4. For data provided below, what is the date of the last procedure performed (month/year)?  
\_\_\_\_\_
  
5. How many pulsed field ablation procedures have been performed at your center for atrial fibrillation/flutter over the past 12 months? (please complete in table below)

|                                                            |  |
|------------------------------------------------------------|--|
| How many patients with Paroxysmal AF?                      |  |
| How many patients with persistent AF?                      |  |
| How many patients with long standing persistent AF?        |  |
| How many patients with atrial flutter only?                |  |
| Other indications (please specify # and type of procedure) |  |
| Total                                                      |  |

*Note: if two procedures in the same patient, please count as two procedures.*

6. What are the baseline characteristics of the patients who have undergone pulsed field ablation (for AF only) at your center? (please complete table below)

|                                                           |  |
|-----------------------------------------------------------|--|
| Age (average, minimum, maximum)                           |  |
| Sex (male=n, female=n)                                    |  |
| BMI (average, min, max )                                  |  |
| CHA2DS2vasc score (average, min, max)                     |  |
| First time ablation? (n)                                  |  |
| Re-do ablation? (n)                                       |  |
| No. of patients undergoing more than 1 PFA procedure? (n) |  |
| LA Diameter-short axis, mm (average, min, max)            |  |
| LVEF, % (average, min, max)                               |  |
| No. of pts with LVEF < 40% (n)                            |  |
| Medical History                                           |  |
| Hypertension (n)                                          |  |
| Diabetes (n)                                              |  |
| Congestive heart failure (n)                              |  |
| Coronary artery disease (n)                               |  |
| Prior stroke or TIA (n)                                   |  |
| Failed Class I or III AADs (n)                            |  |
| Failed Class I, II, III or IV AADs (n)                    |  |
| Baseline Oral Anticoagulants                              |  |
| None (n)                                                  |  |
| VKA (n)                                                   |  |
| N/DOAC (n)                                                |  |

7. Do you routinely perform pre, intra or post procedural imaging? If Yes, complete table below (enter yes or no if applicable)

Yes  No

| <u>Imaging Modality</u> | <i>Prior</i>                            | <i>During</i>                           | <i>Post / Follow-Up</i>                 |
|-------------------------|-----------------------------------------|-----------------------------------------|-----------------------------------------|
| <b><u>TEE</u></b>       | Never / Sometimes / Frequently / Always | Never / Sometimes / Frequently / Always | Never / Sometimes / Frequently / Always |
| <b><u>CT</u></b>        | Never / Sometimes / Frequently / Always | N/ A                                    | Never / Sometimes / Frequently / Always |
| <b><u>MRI</u></b>       | Never / Sometimes / Frequently / Always | N/ A                                    | Never / Sometimes / Frequently / Always |
| <b><u>ICE</u></b>       | N/ A                                    | Never / Sometimes / Frequently / Always | N/ A                                    |
| <b><u>Fluoro</u></b>    | N/ A                                    | Never / Sometimes / Frequently / Always | N/ A                                    |

8. Type of anesthesia for the procedure:
- Number of procedures using GA (with endotracheal intubation): \_\_\_\_\_
  - Number of procedures using deep sedation (no intubated): \_\_\_\_\_
9. Do you create an electroanatomical map to guide your ablation procedures?
- For paroxysmal AF ablation? Never / Sometimes / Frequently / Always
  - For persistent AF ablation? Never / Sometimes / Frequently / Always
  - For LS-persistent AF ablation? Never / Sometimes / Frequently / Always
10. How many transeptal punctures per patient for a typical procedure? \_\_\_\_\_
11. What is the acute pulmonary vein isolation success rate at your center? \_\_\_\_\_
12. For patients with persistent / LS-persistent atrial fibrillation, what additional ablation do you perform with pulsed field ablation? (complete table below)

| Lesion set                      | Yes/No                                  |
|---------------------------------|-----------------------------------------|
| Roof Line                       | Never / Sometimes / Frequently / Always |
| Lateral Mitral Line             | Never / Sometimes / Frequently / Always |
| Posterior Box                   | Never / Sometimes / Frequently / Always |
| Anterior Line                   | Never / Sometimes / Frequently / Always |
| SVC isolation                   | Never / Sometimes / Frequently / Always |
| CFAE                            | Never / Sometimes / Frequently / Always |
| Left Atrial Appendage Isolation | Never / Sometimes / Frequently / Always |
| Non- PV trigger                 | Never / Sometimes / Frequently / Always |

13. What is the mean procedure time for pulsed field ablation for atrial fibrillation at your center? \_\_\_\_\_
14. What is the mean fluoroscopy time for pulsed field ablation for atrial fibrillation at your center? \_\_\_\_\_
15. What proportion of patients were discharged on the same day? \_\_\_\_\_

16. How many patients had minor or major complications after pulsed field ablation? Please complete table below.

| Complications                                                                                                                                       | n                                                  |
|-----------------------------------------------------------------------------------------------------------------------------------------------------|----------------------------------------------------|
| Peri-procedural Death (within 30 days)                                                                                                              |                                                    |
| Myocardial Infarction (within 30 days)                                                                                                              |                                                    |
| Phrenic nerve injury<br>---Number recovered be next day<br>---Number recovered by 1 month<br>---Not yet recovered                                   | _____<br>_____<br>_____<br>_____                   |
| Stroke                                                                                                                                              |                                                    |
| TIA                                                                                                                                                 |                                                    |
| Silent cerebral events (if screening MRIs done)<br>----Number of pts with MRI<br>----Number with positive MRIs                                      | _____<br>_____                                     |
| Other thromboembolism                                                                                                                               |                                                    |
| Pericardial effusion<br>--no intervention<br>--requiring intervention (percutaneous)<br>--requiring intervention (surgical)                         | _____<br>_____<br>_____<br>_____                   |
| Pericarditis requiring intervention                                                                                                                 |                                                    |
| Vascular complications<br>--hematoma<br>--pseudoaneurysm<br>--A-V fistula<br>--Other (please specify)<br>--How many required surgical intervention? | _____<br>_____<br>_____<br>_____<br>_____<br>_____ |
| Pulmonary Vein stenosis                                                                                                                             |                                                    |
| Atrio-esophageal fistula<br>--requiring surgery<br>--causing death                                                                                  | _____<br>_____<br>_____                            |
| Esophageal/Gastric Dysmotility                                                                                                                      |                                                    |
| Coronary artery injury/spasm                                                                                                                        |                                                    |
| Other complications (please specify)                                                                                                                |                                                    |
| <b>Total</b>                                                                                                                                        |                                                    |



**Table S1: Routine Post-PFA Brain MRI**

| Center       | No. of Patients with MRI | Positive MRIs |       |
|--------------|--------------------------|---------------|-------|
|              |                          | No.           | %     |
| Center #1    | 65                       | 10            | 15.4% |
| Center #2    | 30                       | 1             | 3.3%  |
| Center #3    | 19                       | 9             | 47.4% |
| Total Cohort | 114                      | 20            | 17.5% |
